# Supplementary figures and images for: Genome Resolved Biogeography of Mamiellales
Source: MDPI journal article supplement (doi:10.3390/genes11010066), 2020-01-07

Coverage

**6DCM**

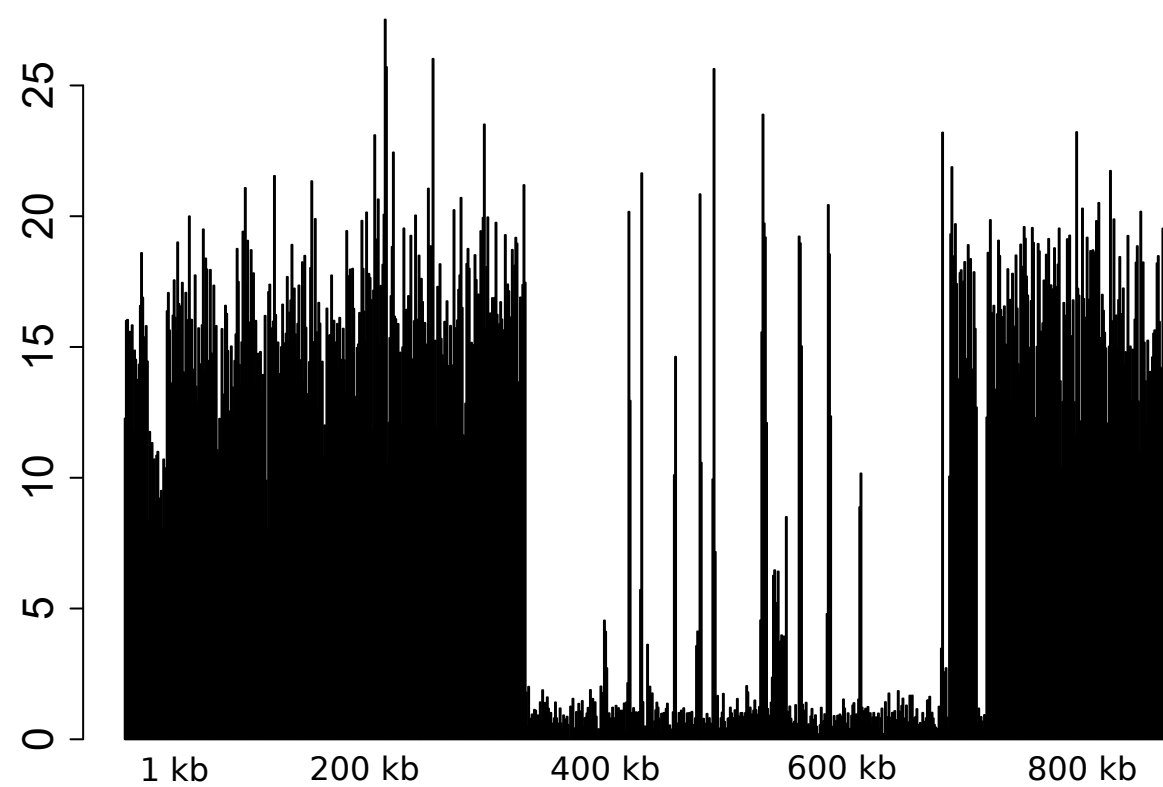

**6SUR**

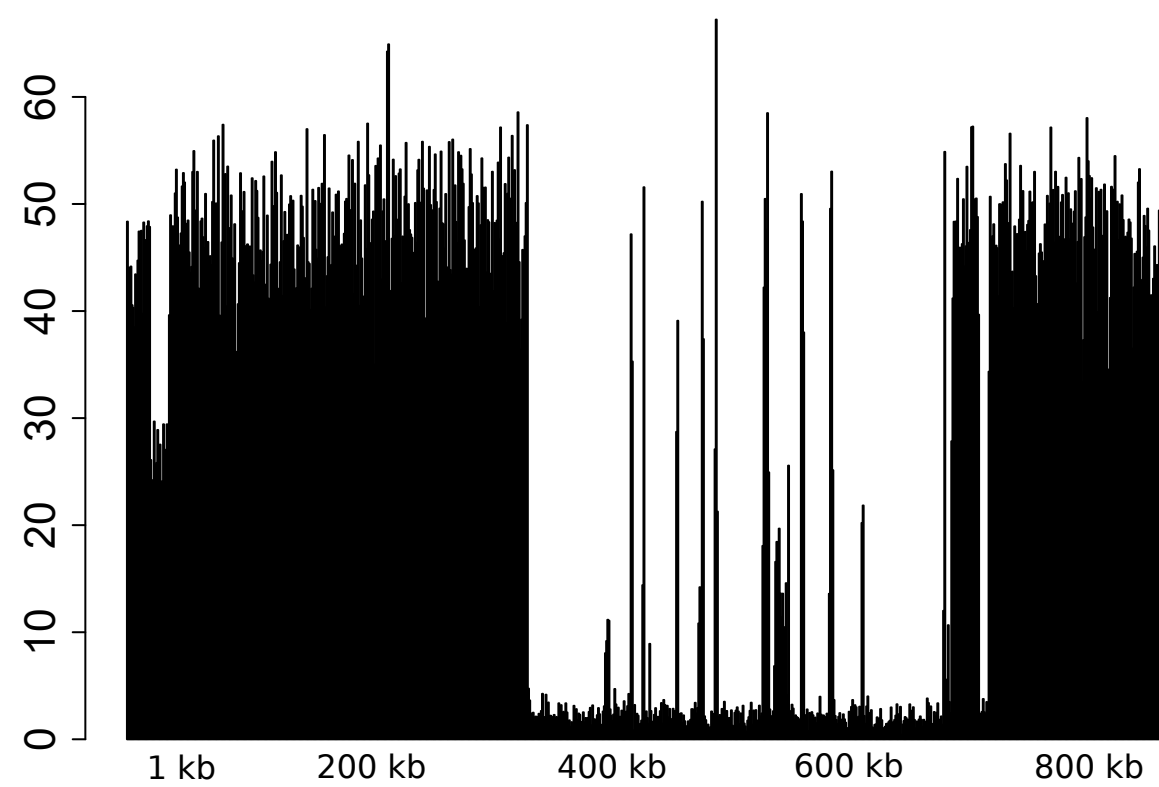

**7DCM**

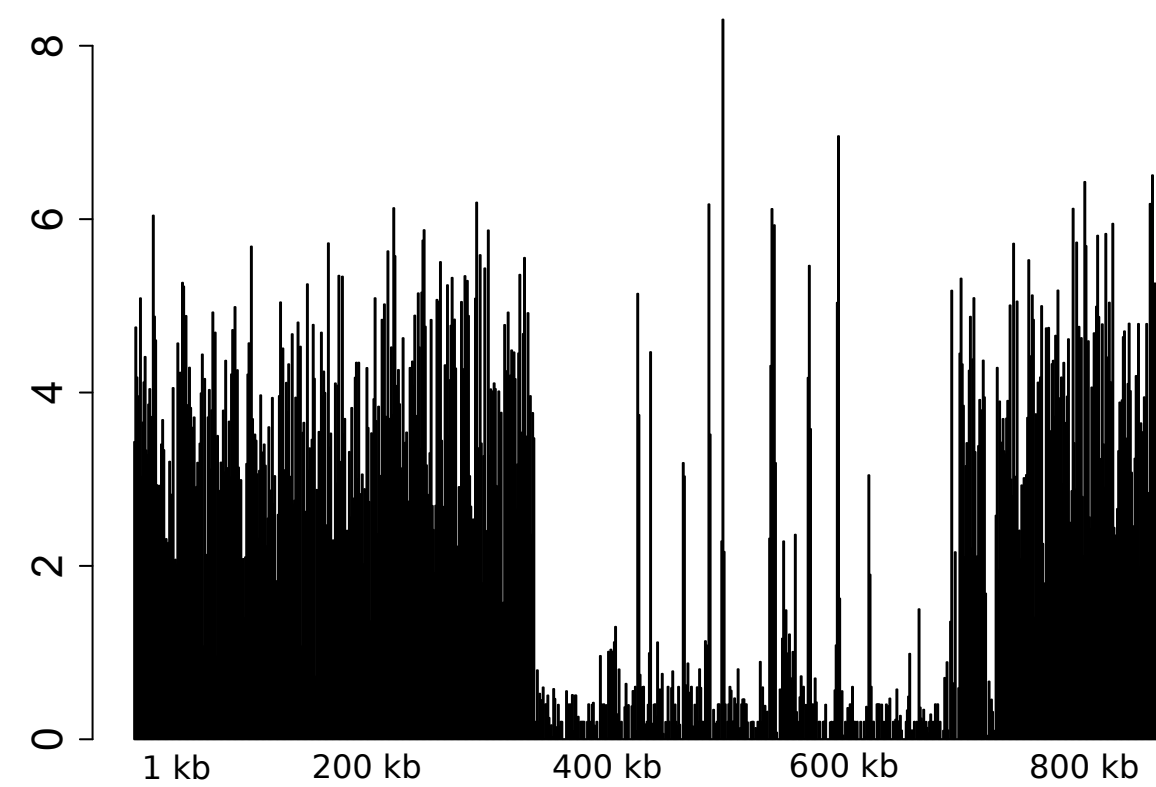

**66DCM**

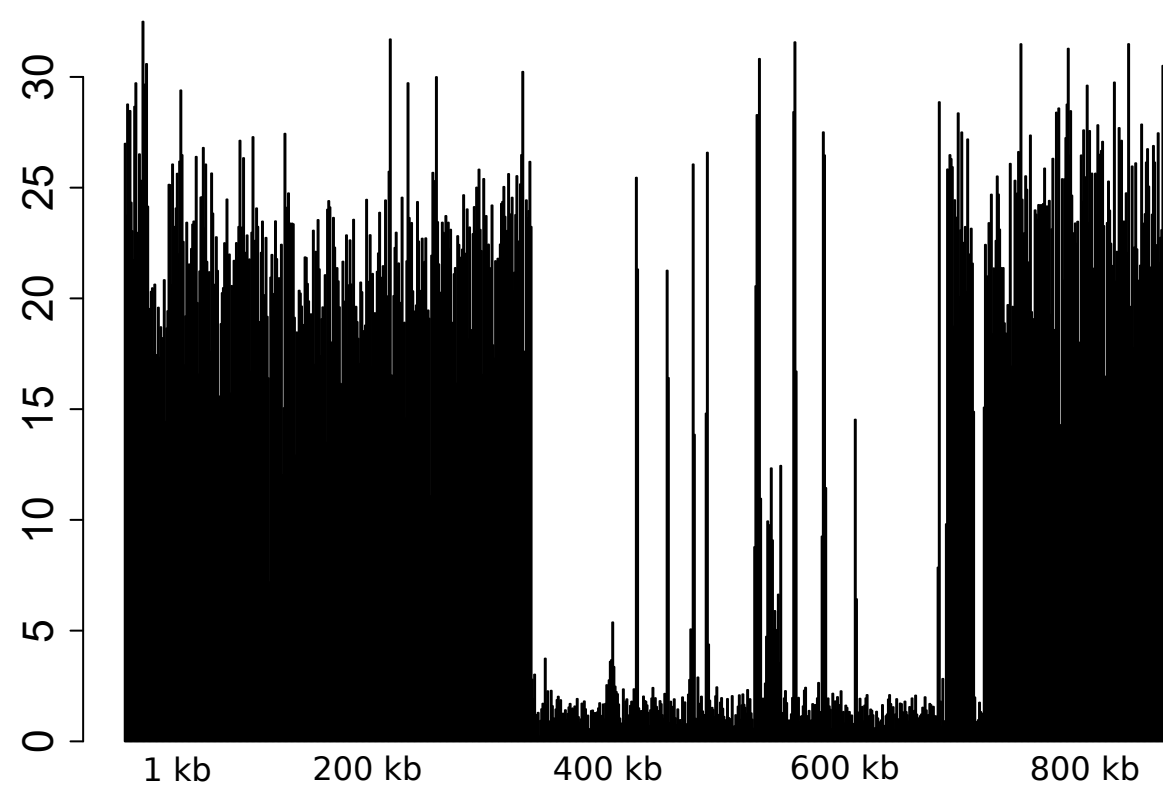

**66SUR**

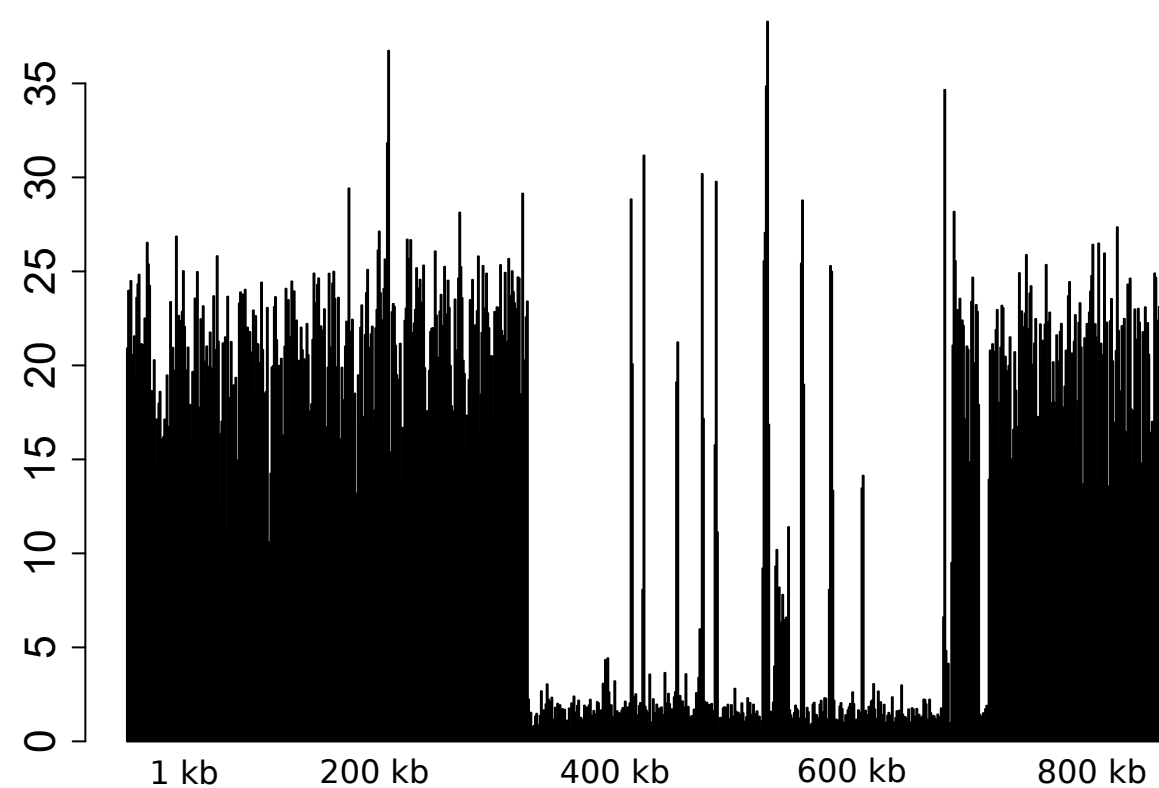

**67SUR**

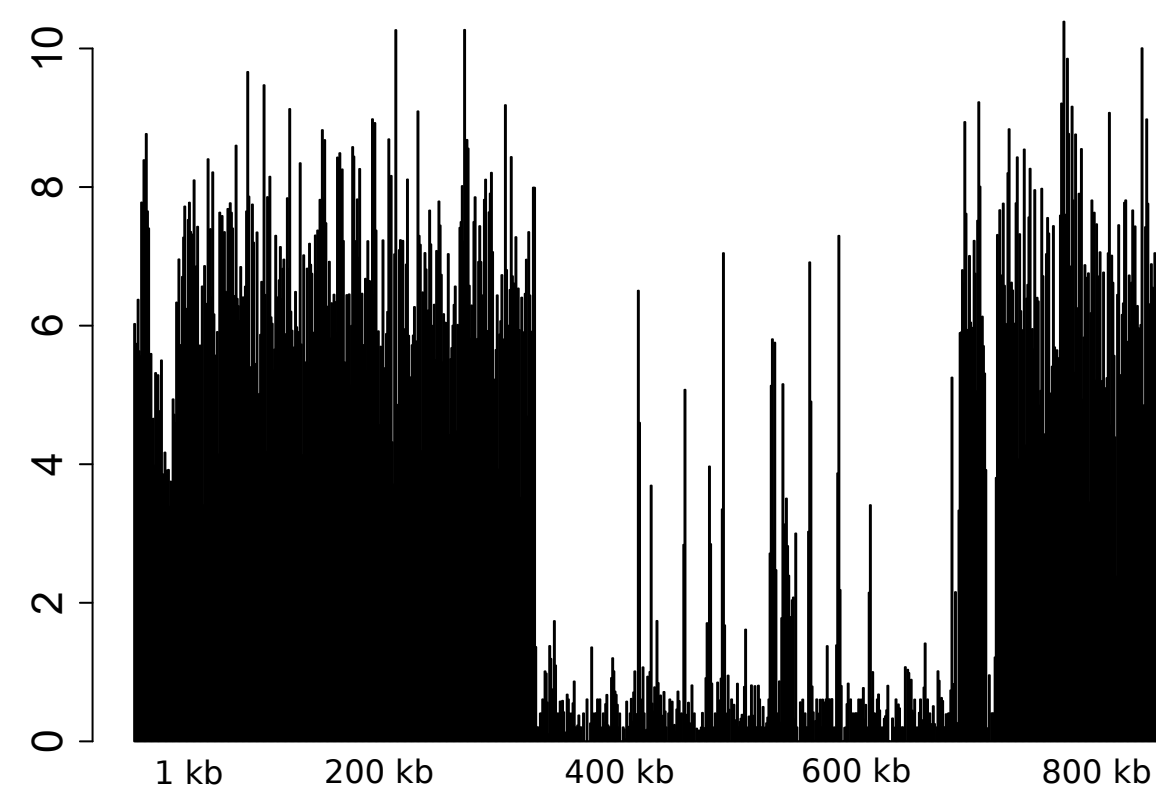

**81DCM**

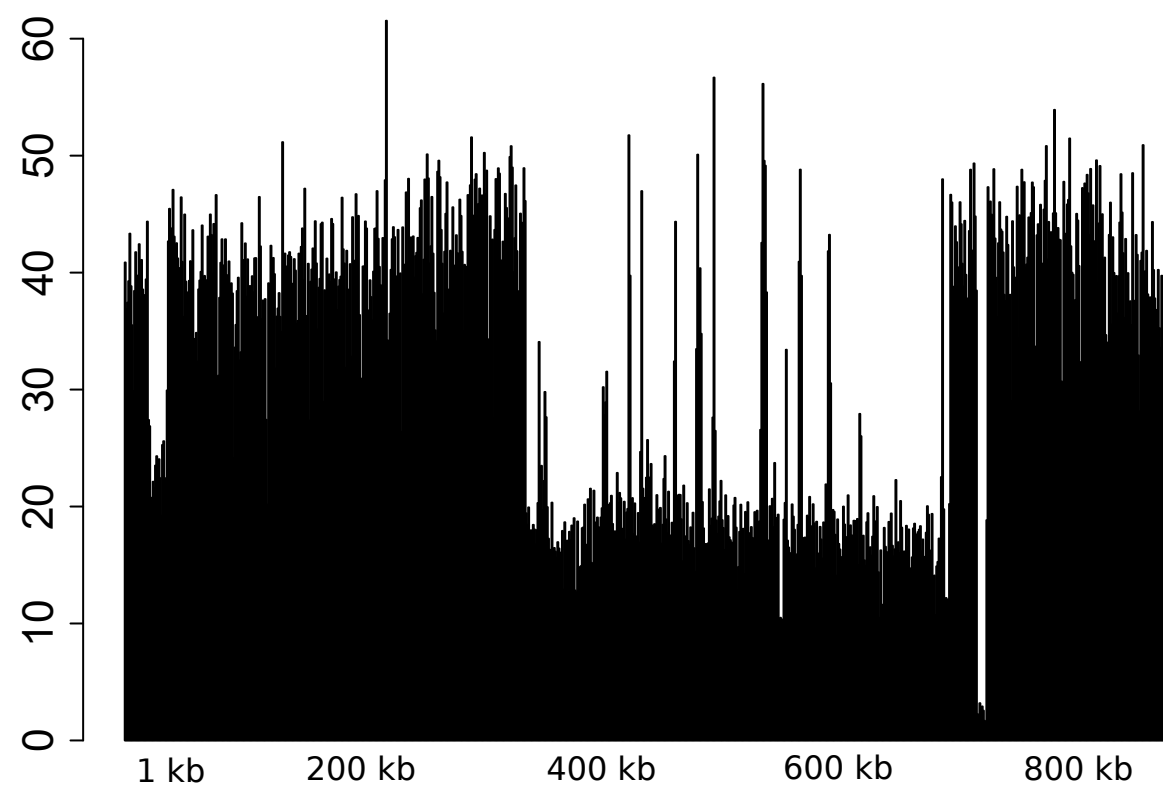

**81SUR**

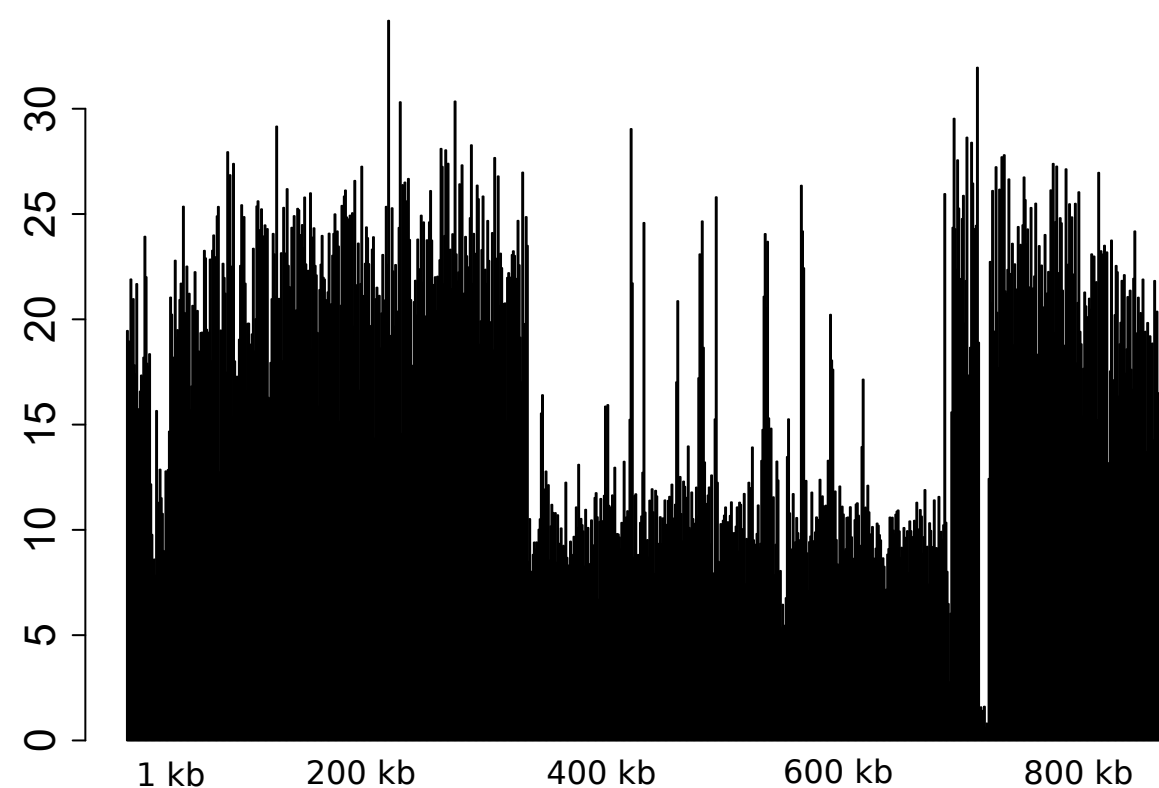

**92SUR**

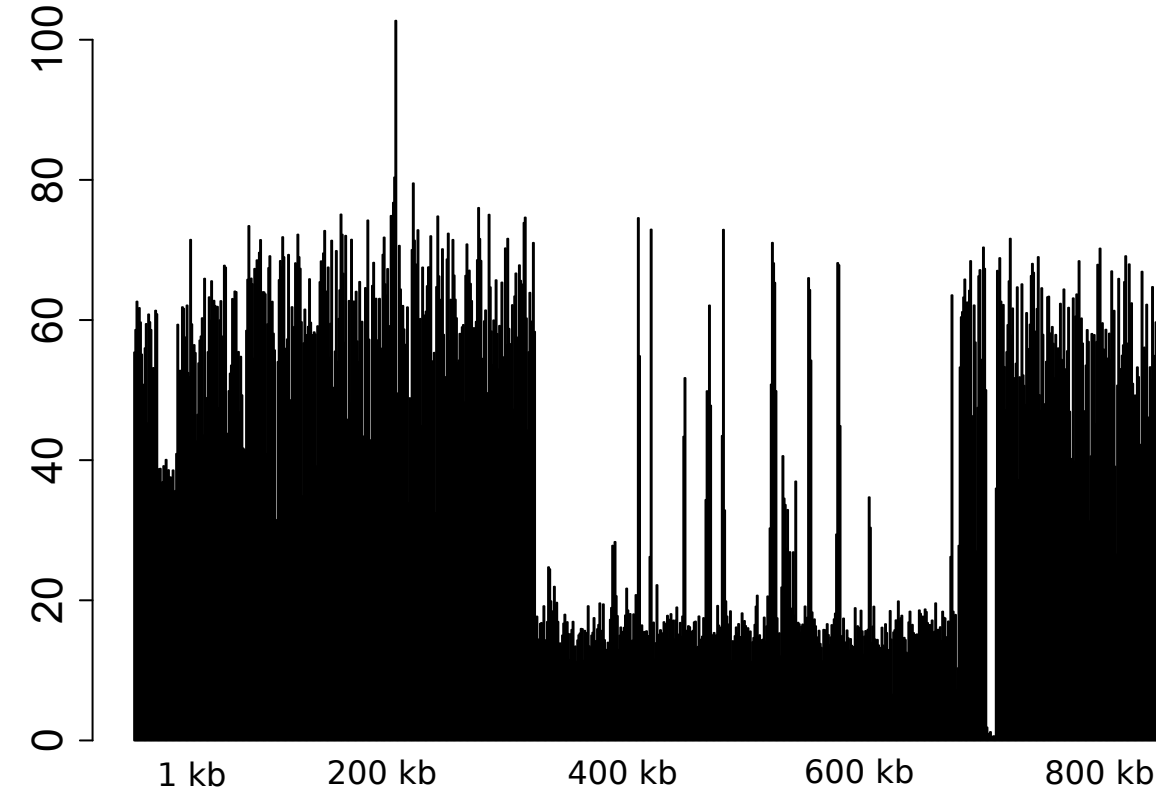

**135DCM**

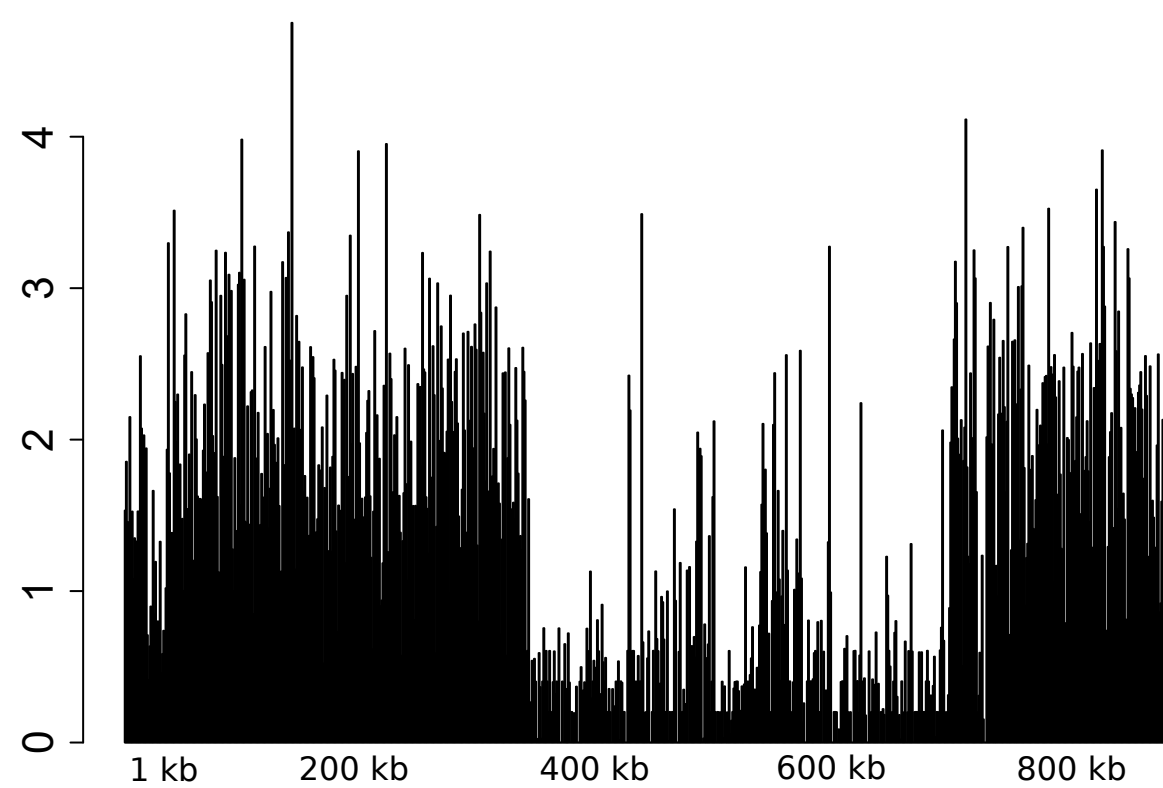

**145SUR**

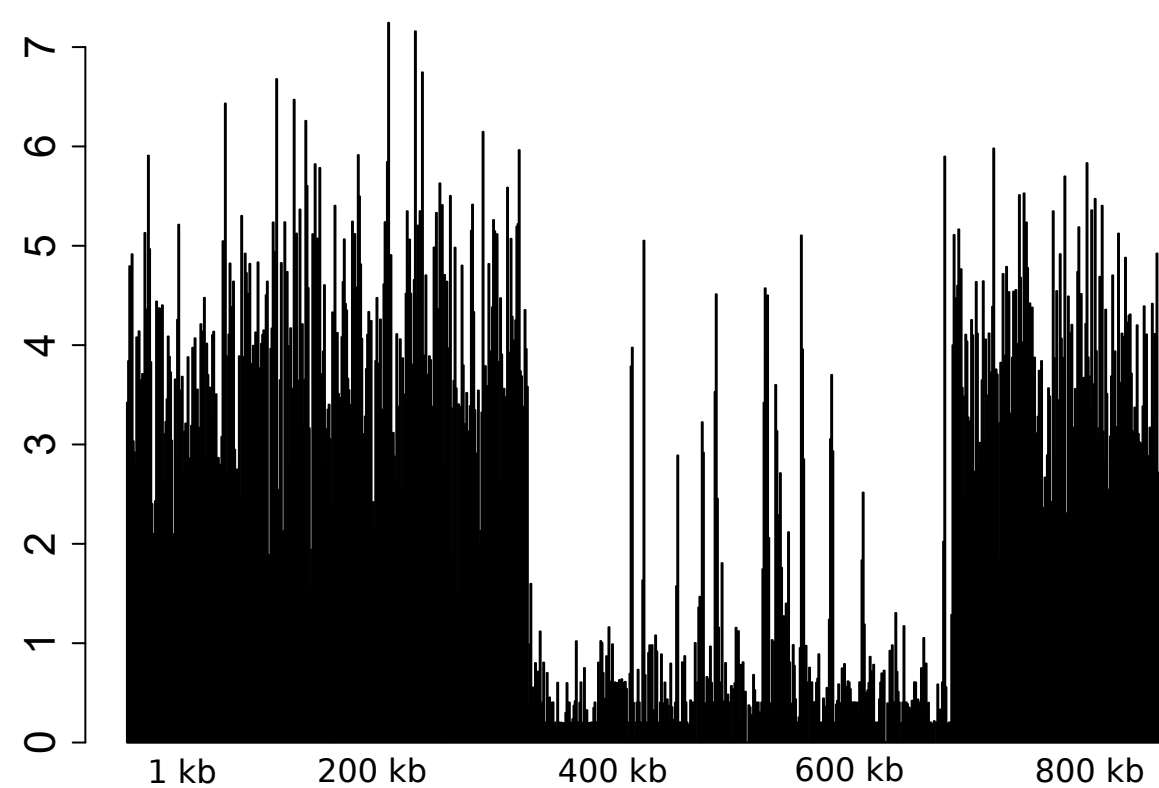

Chromosome 2 position

Supplement: s1 [file s1]

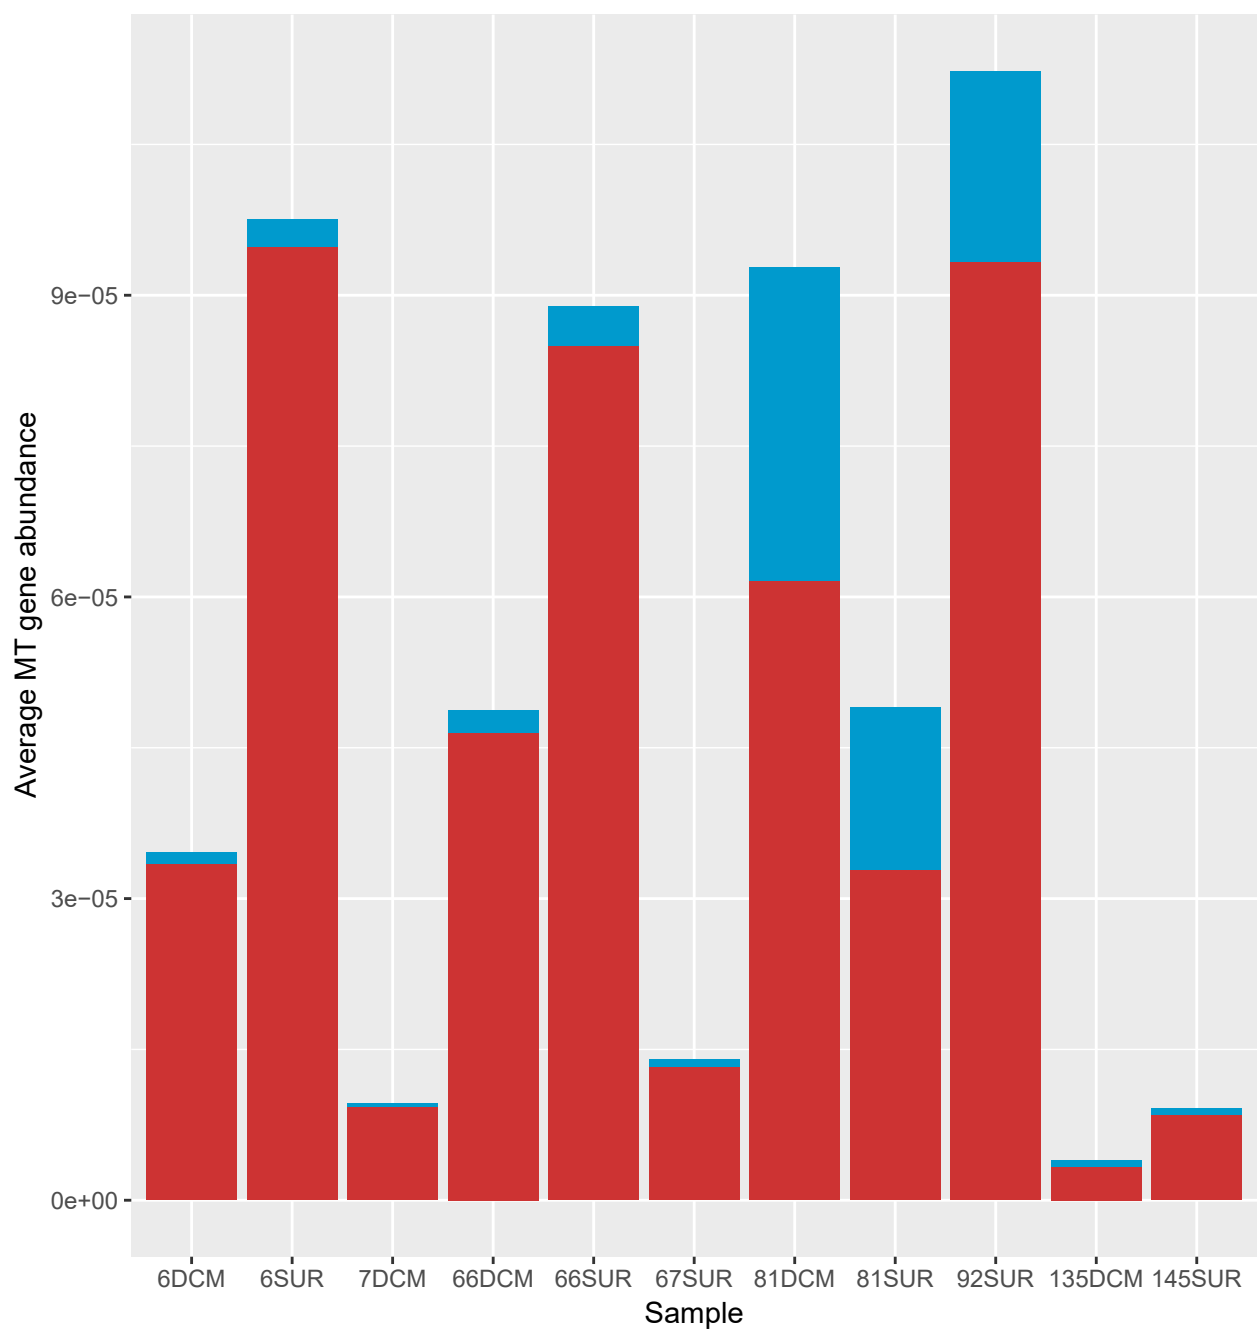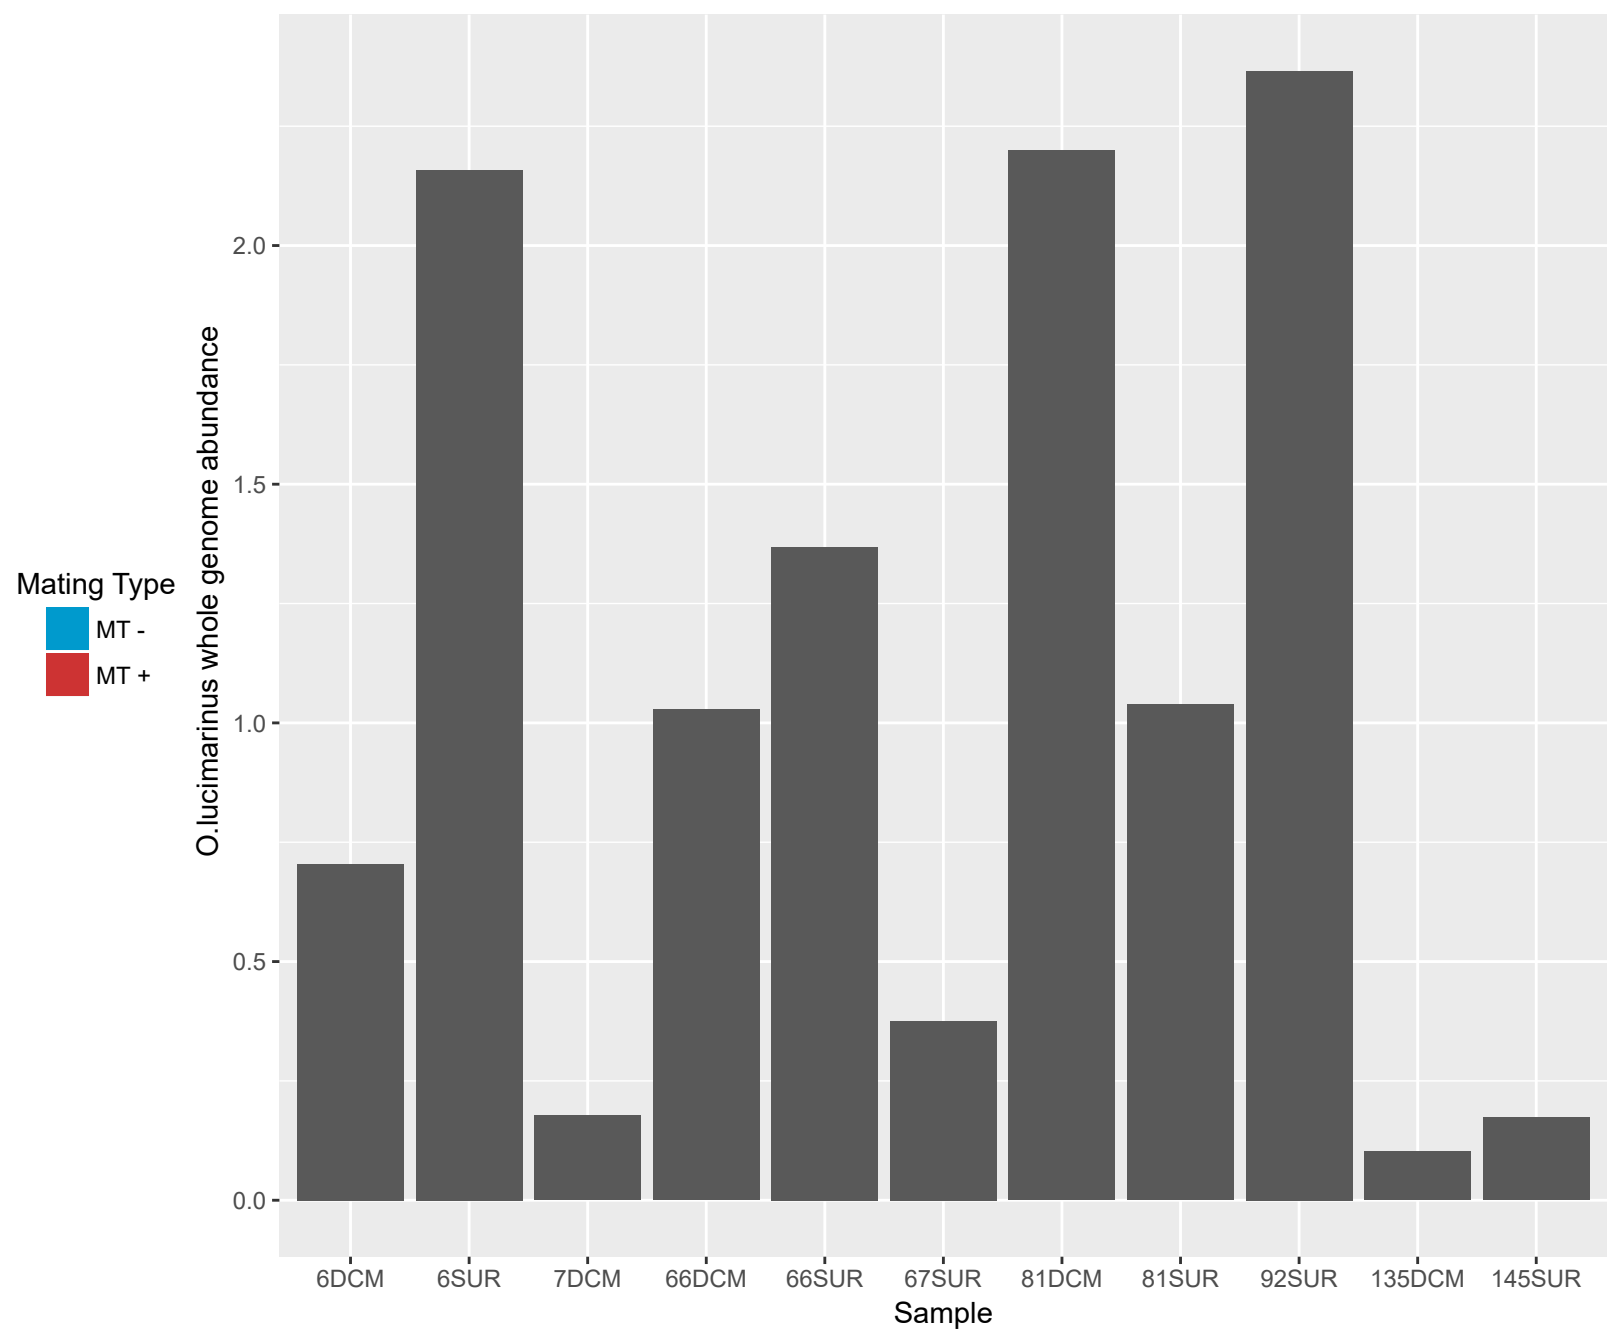

Supplement: s1 [file s1]

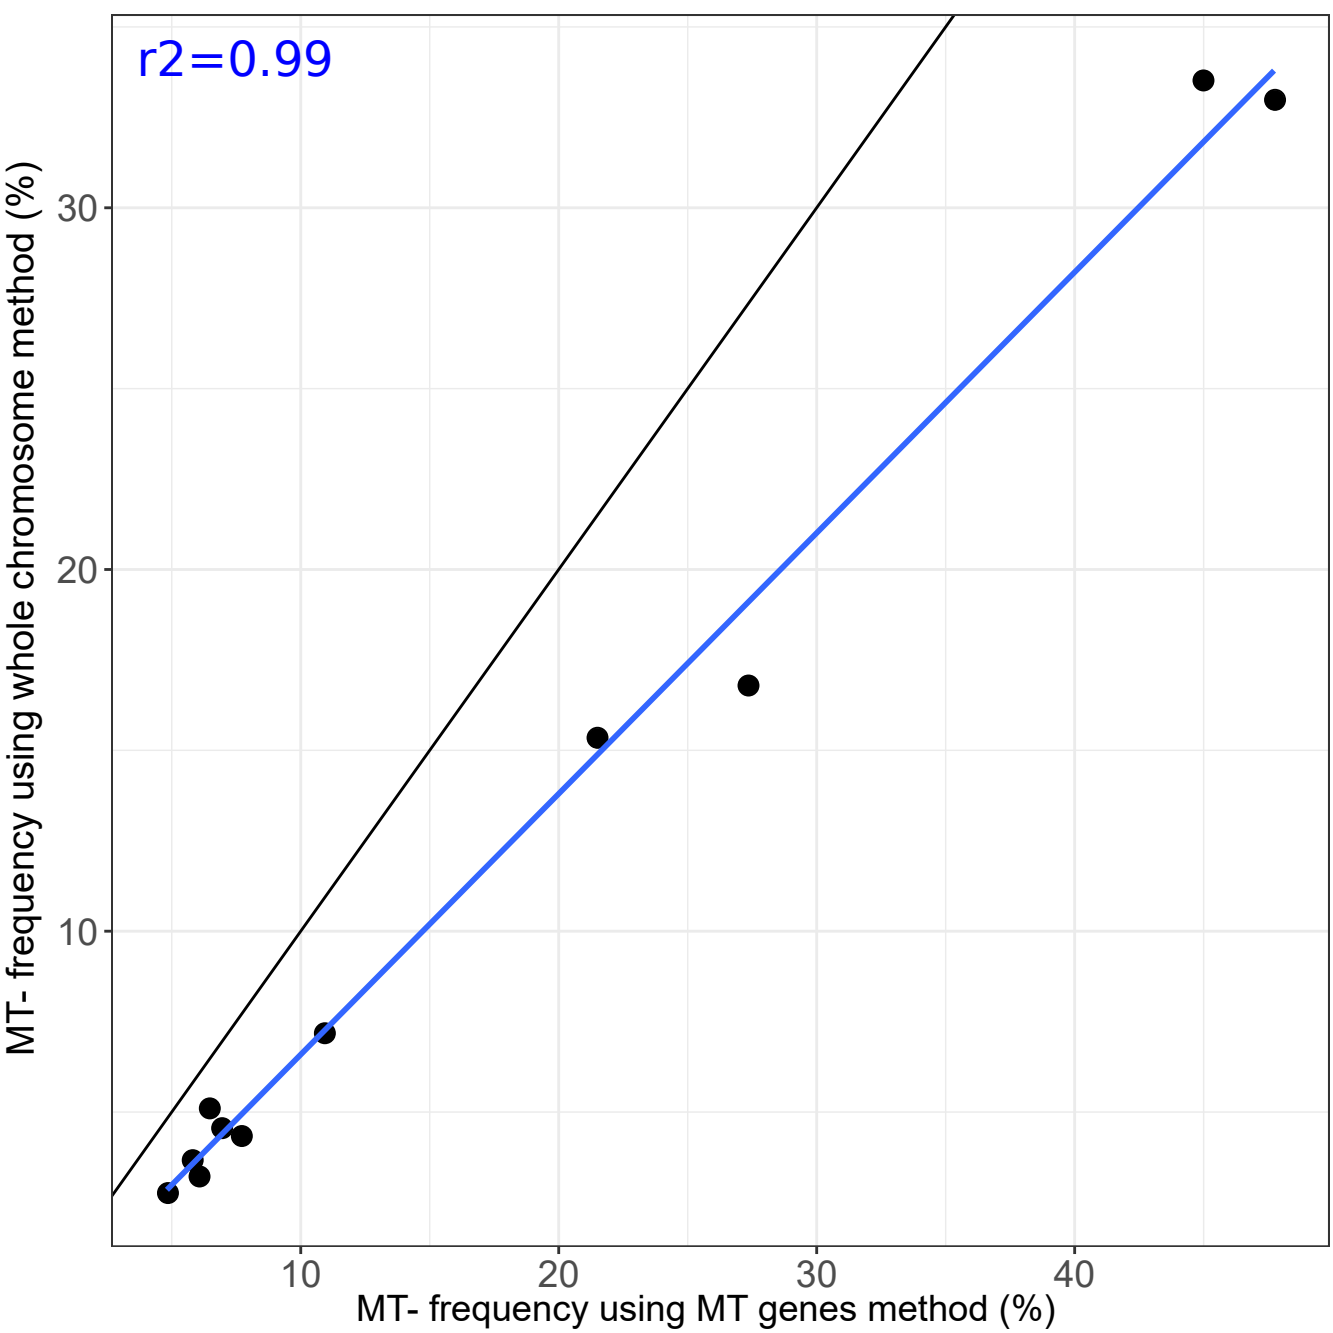

Supplement: s1 [file s1]
